# Supplementary material
Source: ML conference proceedings conference paper supplement (https://openaccess.thecvf.com/content/CVPR2022/html/Vo_NOC-REK_Novel_Object_CVPR_2022_paper.html)
Supplement: Supplementary file 1 [file Vo_NOC-REK_Novel_Object_CVPR_2022_supplemental.pdf]

# NOC-REK: Novel Object Captioning with Retrieved Vocabulary from External Knowledge Supplementary Material

## I. Visualization of external knowledge

We show full visualization of our collected external knowledge in Fig. A. We see that our external knowledge not only adequately clusters the vocabulary (black texts), but also locates new vocabulary (red and blue texts) into appropriate clusters.

## II. More examples

We show more examples of generated captions on held-out COCO dataset [4] in Figs. B, C, D, and E. We can see that our method successfully retrieves novel objects and includes them in the captions in a sensible fashion. Meanwhile, NOC [5] usually fails to generate a caption with a novel object or generates pretty weird captions. Furthermore, in Fig. C (right), the ground truth captions sometimes include *racquet*, explaining the mismatching between our method and ground truth dataset as we mentioned in main manuscript.

We further show generated captions obtained by NOC-REK and VinVL+VIVO [11, 12] on Nocaps dataset [24] in Figs. F and G. Occasionally, VinVL+VIVO [11, 12] cannot generate captions consisting of novel objects or a complete sentence. Generally, our method is capable of generating captions with more objects than those by VinVL+VIVO [11, 12].

## References

- [4] L. A. Hendricks, S. Venugopalan, M. Rohrbach, R. Mooney, S. Kate, and T. Darrell, “Deep compositional captioning: Describing novel object categories without paired training data,” in CVPR, 2016.
- [5] S. Venugopalan, L. A. Hendricks, M. Rohrbach, R. Mooney, T. Darrell, and K. Saenko, “Captioning images with diverse objects,” in CVPR, 2017.
- [11] X. Hu, X. Yin, K. Lin, L. Wang, L. Zhang, J. Gao, and Z. Liu, “Vivo: Surpassing human performance in novel object captioning with visual vocabulary pre-training,” in AAAI, 2021.
- [12] P. Zhang, X. Li, X. Hu, J. Yang, L. Zhang, L. Wang,

Y. Choi, and J. Gao, “Vinvl: Making visual representations matter in vision-language models,” in CVPR, 2021.

- [24] H. Agrawal, P. Anderson, K. Desai, Y. Wang, X. Chen, R. Jain, M. Johnson, D. Batra, D. Parikh, and S. Lee, “nocaps: novel object captioning at scale,” in ICCV, 2019.

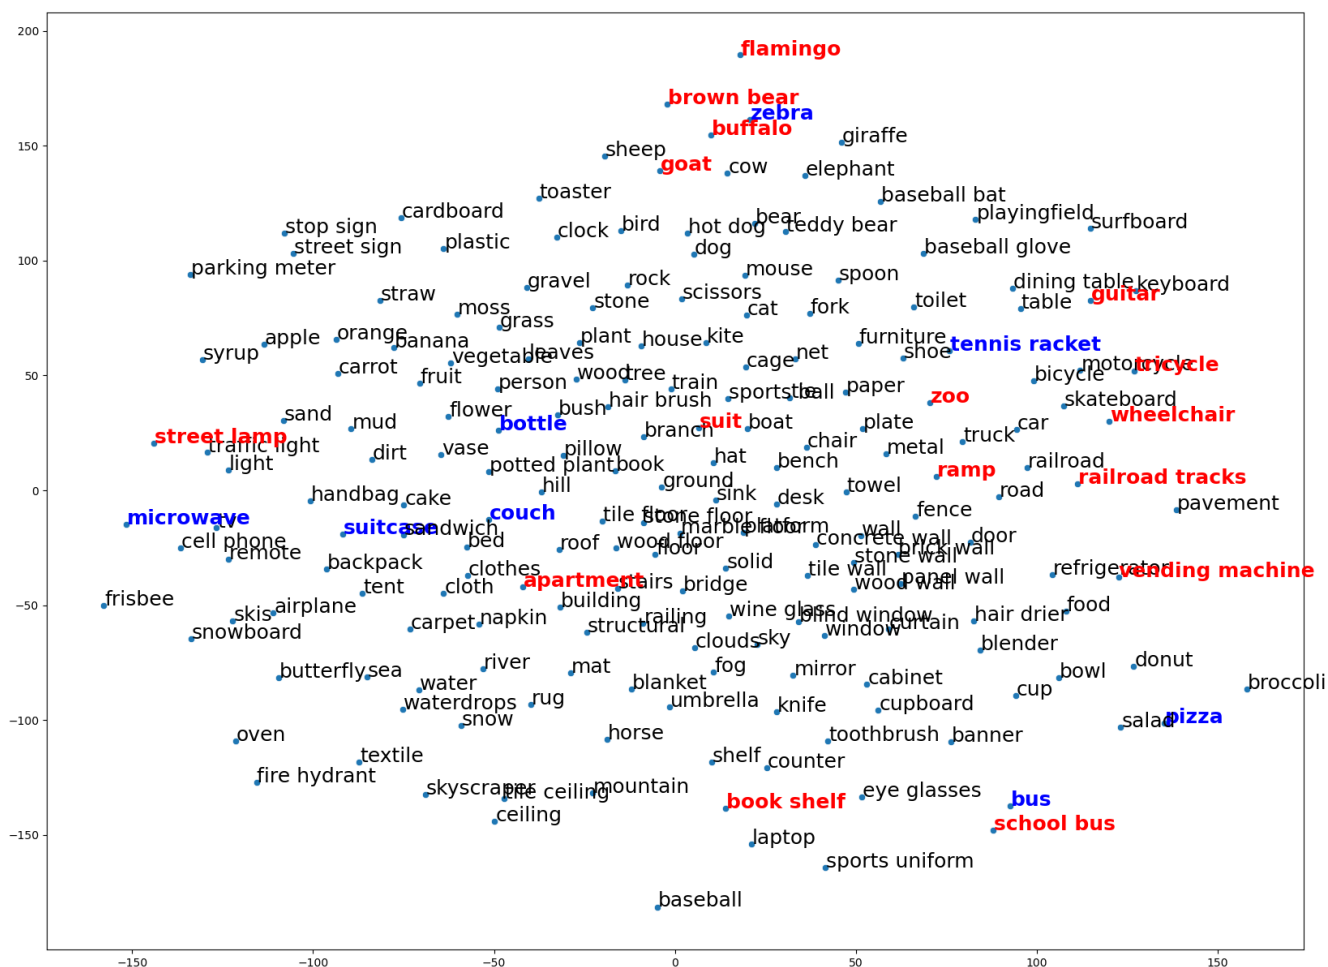

Figure A. Visualization of external knowledge using t-SNE. We see that the related vocabulary (we use objects from the seen classes of held-out COCO dataset) fall in the same cluster (black text). When we add more objects from novel classes of held-out COCO dataset (blue text) and some classes of Nocaps dataset (red text), the novel vocabulary are located at the appropriate cluster.

|                                                                                     |                                                                                                                                                                                                                                                                                                                                                                                                                                                                         |                                                                                     |                                                                                                                                                                                                                                                                                                                                                                                                                                          |
|-------------------------------------------------------------------------------------|-------------------------------------------------------------------------------------------------------------------------------------------------------------------------------------------------------------------------------------------------------------------------------------------------------------------------------------------------------------------------------------------------------------------------------------------------------------------------|-------------------------------------------------------------------------------------|------------------------------------------------------------------------------------------------------------------------------------------------------------------------------------------------------------------------------------------------------------------------------------------------------------------------------------------------------------------------------------------------------------------------------------------|
|    | <p>GT: A wooden table with two hotdogs in wrapping and a <b>bottle</b> of soda..</p> <p>NOC: A sandwich with a paper roll sitting on a table.</p> <p>NOC-REK*: A close up of a hot dog and a <b>bottle</b> on a table (<i>hot dog, wooden table, paper, food</i>)</p> <p>NOC-REK: A hotdog and a <b>bottle</b> of soda on a table. (<i>bottle, hot dog, table, paper, sandwich</i>)</p> <p>GT: Plates of food with fruit and sandwiches and <b>bottles</b> of beer.</p> |    | <p>GT: A <b>bus</b> stopped in front of a tall red building.</p> <p>NOC: A <b>bus</b> stopped at a bus stop on a city street.</p> <p>NOC-REK*: A <b>bus</b> parked in front of a building. (<i>bus, building, street, window, tire</i>)</p> <p>NOC-REK: a blue and white <b>bus</b> parked in front of a red building. (<i>city, bus, building, street, window</i>)</p> <p>GT: A red and white <b>bus</b> parked under an over pass.</p> |
|    | <p>NOC: A plate of food with a hot dog and a glass of wine.</p> <p>NOC-REK*: A couple of plates of food on a table. (<i>plate, food, dining table, pole, fork</i>)</p> <p>NOC-REK: A plate of food and <b>bottles</b> of beer on a counter. (<i>food, bottle, beer, fork, fruit</i>)</p> <p>GT: A microwave and some <b>bottles</b> on a counter.</p>                                                                                                                   |    | <p>NOC: A <b>bus</b> driving past a red double decker <b>bus</b>.</p> <p>NOC-REK*: A public transit <b>bus</b> on a city street. (<i>bus, street, stop sign, car, building</i>)</p> <p>NOC-REK: A red and white <b>bus</b> driving under a bridge. (<i>bus, traffic light, stop sign, bridge, street</i>)</p> <p>GT: Four coach <b>buses</b> parked in a parking lot.</p>                                                                |
|   | <p>NOC: A kitchen with a wooden counter top and a stove.</p> <p>NOC-REK*: A kitchen counter with a toaster oven (<i>oven, kitchen, vase, curtain, bottle</i>)</p> <p>NOC-REK: A kitchen counter with a microwave and <b>bottles</b> of wine. (<i>microwave, bottle, kitchen, wooden table, kitchen appliance</i>)</p> <p>GT: A man sitting at a picnic table studying a <b>bottle</b>.</p>                                                                              |   | <p>NOC: A large white and red <b>bus</b> driving down a street.</p> <p>NOC-REK*: A row of <b>buses</b> parked next to each other in a parking lot. (<i>bus, street, parking lot, sky, cloud</i>)</p> <p>NOC-REK: A group of <b>buses</b> parked in a parking lot. (<i>bus, parking lot, building, window, mountain</i>)</p> <p>GT: A row of parked motorcycles sitting next to a white double decker <b>bus</b>.</p>                     |
|  | <p>NOC: A man sitting on a lawn chair in front of a lawn chair.</p> <p>NOC-REK*: A man sitting at a table with a <b>bottle</b> of water in front of him. (<i>chair, bottle, man, grass, tree</i>)</p> <p>NOC-REK: A man sitting at a picnic table with a <b>bottle</b> of water. (<i>man, table, bottle, wine glass, cloth</i>)</p>                                                                                                                                     |  | <p>NOC: A group of motorcycles parked in a row.</p> <p>NOC-REK*: A motorcycles parked in front of a <b>bus</b>. (<i>motorcycle, bus, person, shirt, sand</i>)</p> <p>NOC-REK: A group of motorcycles parked in front of a <b>bus</b>. (<i>person, motorcycle, bus, school bus, windshield</i>)</p>                                                                                                                                       |

Figure B. Examples of generated captions by compared methods on held-out COCO, specifically, **bottle** and **bus** classes. We show the ground-truth captions (GT) for reference. NOC [5] usually fails to generate captions with novel objects. Our NOC-REK, on the other hand, successfully generates correct, fluent, and coherent captions with novel objects. Words in parentheses are top-5 retrieved vocabulary by our method that are reasonably related to objects in image. **Red** texts indicate novel objects in the captions.

|                                                                                                                                                                                                                                                                                                                                                                                                                                                                                  |                                                                                                                                                                                                                                                                                                                                                                                                                                                                                                                                 |
|----------------------------------------------------------------------------------------------------------------------------------------------------------------------------------------------------------------------------------------------------------------------------------------------------------------------------------------------------------------------------------------------------------------------------------------------------------------------------------|---------------------------------------------------------------------------------------------------------------------------------------------------------------------------------------------------------------------------------------------------------------------------------------------------------------------------------------------------------------------------------------------------------------------------------------------------------------------------------------------------------------------------------|
|  <p>GT: A woman sitting on the <b>couch</b> with her laptop.</p> <p>NOC: A man is sitting on a bed with a laptop.</p> <p>NOC-REK*: A woman sitting on a <b>couch</b> using a laptop computer. (<i>woman, laptop, couch, book, book shelf</i>)</p> <p>NOC-REK: A woman sitting on a <b>couch</b> with a laptop. (<i>laptop, woman, couch, map, book shelf</i>)</p>                               |  <p>GT: A strainer sitting next to a <b>microwave</b> and a window.</p> <p>NOC: A bathroom with a toilet and a sink.</p> <p>NOC-REK*: A blue bowl sitting on top of a wooden table. (<i>wooden table, bowl, wall, window, oven</i>)</p> <p>NOC-REK: A blue bowl sitting on a table next to a <b>microwave</b>. (<i>bowl, microwave, table, oven, wall</i>)</p>                                                                                 |
|  <p>GT: 2 men sit on the <b>couch</b>, video game controllers in hands.</p> <p>NOC: A man sitting at a table eating a meal.</p> <p>NOC-REK*: Two men sitting on a <b>couch</b> playing a video game. (<i>people, controller, wii, couch, human face</i>)</p> <p>NOC-REK: A couple of men sitting on a <b>couch</b> playing a video game. (<i>man, people, couch, controller, window</i>)</p>    |  <p>GT: A sofa chair and a <b>microwave</b> sitting on top of it.</p> <p>NOC: A large white and grey brick building with a large square bush.</p> <p>NOC-REK*: A chair sitting in front of a brick wall. (<i>chair, brick, wall, window, microwave</i>)</p> <p>NOC-REK: A green chair with a <b>microwave</b> on top of it. (<i>couch, chair, microwave, table, wall</i>)</p>                                                                  |
|  <p>GT: A living room with a brown <b>couch</b> by a big window.</p> <p>NOC: A room with a <b>couch</b>, chair, table, and a tv.</p> <p>NOC-REK*: A living room filled with furniture and a large window. (<i>furniture, window, curtain, light, living room</i>)</p> <p>NOC-REK: A living room with a <b>couch</b> and a large window. (<i>living room, couch, window, curtain, book</i>)</p> |  <p>GT: A brown cat is sitting on top of a <b>microwave</b>.</p> <p>NOC: A cat is sitting on a kitchen counter.</p> <p>NOC-REK*: A cat sitting on top of a kitchen counter. (<i>cat, cabinet, wall, kitchen, microwave</i>)</p> <p>NOC-REK: A cat sitting on top of a <b>microwave</b>. (<i>cat, kitchen, cabinet, microwave, bottle</i>)</p>                                                                                                 |
|  <p>GT: A black cat resting himself on a <b>couch</b>.</p> <p>NOC: A black and white cat is sitting on a black chair.</p> <p>NOC-REK*: A black cat sitting on top of a white <b>couch</b>. (<i>cat, couch, wall, sky, chair</i>)</p> <p>NOC-REK: A black cat laying on a <b>couch</b>. (<i>cat, couch, wall, floor, chair</i>)</p>                                                            |  <p>GT: Small kitchen with wood cabinets, white refrigerator, <b>microwave</b>.</p> <p>NOC: A kitchen with a sink and refrigerator in it.</p> <p>NOC-REK*: A white refrigerator freezer sitting inside of a kitchen. (<i>refrigerator, kitchen, cabinet, cloth, kitchen appliance</i>)</p> <p>NOC-REK: A small kitchen with a refrigerator and a <b>microwave</b>. (<i>kitchen, microwave, refrigerator, utensil, kitchen appliance</i>)</p> |

Figure C. Examples of generated captions by compared methods on held-out COCO, specifically, **couch** and **microwave** classes. We show the ground-truth captions (GT) on for reference. NOC [5] usually fails to generate captions with novel objects. Our NOC-REK, on the other hand, successfully generates correct, fluent, and coherent captions with novel objects. Words in parentheses are top-5 retrieved vocabulary by our method that are reasonably related to objects in image. **Red** texts indicate novel objects in the captions.

|                                                                                                                                                                                                                                                                                                                                                                                                                                                                                                         |                                                                                                                                                                                                                                                                                                                                                                                                                                                                                                    |
|---------------------------------------------------------------------------------------------------------------------------------------------------------------------------------------------------------------------------------------------------------------------------------------------------------------------------------------------------------------------------------------------------------------------------------------------------------------------------------------------------------|----------------------------------------------------------------------------------------------------------------------------------------------------------------------------------------------------------------------------------------------------------------------------------------------------------------------------------------------------------------------------------------------------------------------------------------------------------------------------------------------------|
|  <p>GT: Two girls standing in a store eating <b>pizza</b> and food.</p> <p>NOC: A woman holding a cell phone standing next to a woman.</p> <p>NOC-REK*: a couple of women standing next to each other eating <b>pizza</b>. (<i>pizza, woman, people, sign, refrigerator</i>)</p> <p>NOC-REK: a couple of women eating <b>pizza</b> in a store. (<i>pizza, woman, people, store, sign</i>)</p>                          |  <p>GT: A man holding a tennis <b>racket</b> and playing tennis on a tennis court.</p> <p>NOC: A man is standing in the grass with a <b>racket</b>.</p> <p>NOC-REK*: A man holding a tennis <b>racket</b> on top of a tennis court. (<i>sky, person, racket, tree, fence</i>)</p> <p>NOC-REK: A man holding a tennis <b>racket</b> in front of a fence. (<i>racket, man, sunglasses, fence, shirt</i>)</p>        |
|  <p>GT: Two people sitting behind a large <b>pizza</b> on a table.</p> <p>NOC: <b>Pizza</b> sitting on a plate on a table.</p> <p>NOC-REK*: A couple of people sitting at a table with a <b>pizza</b>. (<i>people, pizza, couch, wall, window</i>)</p> <p>NOC-REK: A couple of people sitting in front of a large <b>pizza</b>. (<i>pizza, people, person, table, couch</i>)</p>                                       |  <p>GT: A woman standing on a tennis court holding a <b>racquet</b>.</p> <p>NOC: A tennis player is getting ready to return a ball.</p> <p>NOC-REK*: A woman in a short skirt holding a tennis <b>racket</b>. (<i>racket, woman, skirt, pole, sand</i>)</p> <p>NOC-REK: A woman in a white dress holding a tennis <b>racket</b>. (<i>racket, tennis court, woman, dress, skirt</i>)</p>                           |
|  <p>GT: Someone cutting a small <b>pizza</b> with a pizza cutter.</p> <p>NOC: A person cutting a piece of cake on a cutting board.</p> <p>NOC-REK*: A person cutting a <b>pizza</b>. (<i>pizza, person, table, knife, plate</i>)</p> <p>NOC-REK: A person cutting a <b>pizza</b> with a pizza cutter. (<i>pizza, cutter, person, table, plate</i>)</p>                                                                |  <p>GT: A group of women sitting around each other holding <b>racquets</b>.</p> <p>NOC: A woman sitting on a chair with a teddy bear.</p> <p>NOC-REK*: A group of women sitting next to each other on a bench. (<i>woman, person, people, racket, bench</i>)</p> <p>NOC-REK: A group of women sitting on a bench with tennis <b>rackets</b>. (<i>racket, people, bench, woman, wall</i>)</p>                     |
|  <p>GT: A young girl sitting at a table that has two <b>pizzas</b> and a peps beverage glass on it.</p> <p>NOC: A woman sitting on a table next to a plate of food.</p> <p>NOC-REK*: A little girl sitting at a table with a plate of <b>pizza</b>. (<i>girl, chair, pizza, food, window</i>)</p> <p>NOC-REK: A little girl sitting at a table with two <b>pizzas</b>. (<i>girl, pizza, plate, glass, table</i>)</p> |  <p>GT: A young girl lays on a wooden floor while clutching a tennis <b>racquet</b>.</p> <p>NOC: A woman is holding a <b>racket</b> in her hand.</p> <p>NOC-REK*: A young girl laying on a tennis court holding a tennis <b>racket</b>. (<i>woman, shirt, racket, girl, tennis court</i>)</p> <p>NOC-REK: A woman laying on the floor with a tennis <b>racket</b>. (<i>woman, floor, racket, hat, coat</i>)</p> |

Figure D. Examples of generated captions by compared methods on held-out COCO, specifically, **pizza** and **racket** classes. We show the ground-truth captions (GT) for reference. NOC [5] usually fails to generate captions with novel objects. Our NOC-REK, on the other hand, successfully generates correct, fluent, and coherent captions with novel objects. Words in parentheses are top-5 retrieved vocabulary by our method that are reasonably related to objects in image. **Red** texts indicate novel objects in the captions.

|                                                                                                                                                                                                                                                                                                                                                                                                                                                                          |                                                                                                                                                                                                                                                                                                                                                                                                                                                                                                                |
|--------------------------------------------------------------------------------------------------------------------------------------------------------------------------------------------------------------------------------------------------------------------------------------------------------------------------------------------------------------------------------------------------------------------------------------------------------------------------|----------------------------------------------------------------------------------------------------------------------------------------------------------------------------------------------------------------------------------------------------------------------------------------------------------------------------------------------------------------------------------------------------------------------------------------------------------------------------------------------------------------|
|  <p>GT: A cat is sitting on top of a <b>suitcase</b>.</p> <p>NOC: A cat laying on top of a <b>suitcase</b>.</p> <p>NOC-REK*: A cat sitting on top of a blue piece of <b>luggage</b>. (<i>kitty, cat, luggage, floor, wheel</i>)</p> <p>NOC-REK: A cat sitting on top of a blue <b>suitcase</b>. (<i>cat, suitcase, luggage, floor, wooden floor</i>)</p>                                |  <p>GT: A group of <b>zebra</b>'s eating hay from a trough.</p> <p>NOC: <b>Zebra</b> grazing in a fenced area next to a zebra.</p> <p>NOC-REK*: A herd of <b>zebra</b> standing on top of a dry grass field. (<i>zebra, field, tree, grass, hill</i>)</p> <p>NOC-REK: A group of <b>zebras</b> eating hay in a field. (<i>zebra, hay, grass, field, tree</i>)</p>                                                             |
|  <p>GT: A man sitting on a wooden bench with a <b>suitcase</b> and a box on his lap.</p> <p>NOC: A man sitting on a bench with a dog.</p> <p>NOC-REK*: A man sitting on a bench next to a <b>suitcase</b>. (<i>bench, man, person, suitcase, people</i>)</p> <p>NOC-REK: A man sitting on a bench with a <b>suitcase</b>. (<i>suitcase, man, bench, suit, brick</i>)</p>                |  <p>GT: A young man standing in front of a <b>zebra</b> in an enclosure.</p> <p>NOC: A man standing next to a <b>zebra</b> standing next to a wooden fence.</p> <p>NOC-REK*: A man standing next to a <b>zebra</b> on a field. (<i>man, zebra, fence, tree, field</i>)</p> <p>NOC-REK: A man standing in front of a <b>zebra</b> at a zoo. (<i>zebra, man, zoo, grass, tree</i>)</p>                                          |
|  <p>GT: A <b>suitcase</b> lying on the ground with a spare tire and jack.</p> <p>NOC: A black and white cat is sitting on a car.</p> <p>NOC-REK*: A couple of bags of <b>luggage</b> sitting on top of a gravel ground. (<i>luggage, wheel, tire, ground, pole</i>)</p> <p>NOC-REK: A black <b>suitcase</b> sitting next to a tire. (<i>suitcase, luggage, tire, wheel, stone</i>)</p> |  <p>GT: A realistic painting of two <b>zebras</b> huddled in brown grass.</p> <p>NOC: Zebra standing next to another <b>zebra</b> standing next to another zebra.</p> <p>NOC-REK*: Two <b>zebra</b> standing next to each other on a dry grass field. (<i>zebra, grass, field, cloud, tree</i>)</p> <p>NOC-REK: A painting of two <b>zebras</b> standing next to each other. (<i>zebra, grass, painting, sky, cloud</i>)</p> |
|  <p>GT: A boy in a tie holding a small <b>suitcase</b>.</p> <p>NOC: A man standing next to a man on a skateboard.</p> <p>NOC-REK*: A little boy that is standing next to a <b>suitcase</b>. (<i>person, suitcase, window, floor, people</i>)</p> <p>NOC-REK: A young boy wearing a tie holding a <b>suitcase</b>. (<i>man, tie, suitcase, shirt, table</i>)</p>                       |  <p>GT: A field full of <b>zebras</b> and giraffes at a zoo.</p> <p>NOC: <b>Zebras</b> grazing near trees in a field near trees.</p> <p>NOC-REK*: A herd of <b>zebra</b> grazing on a lush green field. (<i>grass, field, tree, zebra, sky</i>)</p> <p>NOC-REK: A couple of <b>zebras</b> and giraffes grazing in a field. (<i>zebra, giraffe, grass, tree, bird</i>)</p>                                                   |

Figure E. Examples of generated captions by compared methods on held-out COCO, specifically, **suitcase** and **zebra** classes. We show the ground-truth captions (GT) for reference. NOC [5] usually fails to generate captions with novel objects. Our NOC-REK, on the other hand, successfully generates correct, fluent, and coherent captions with novel objects. Words in parentheses are top-5 retrieved vocabulary by our method that are reasonably related to objects in image. **Red** texts indicate novel objects in the captions.

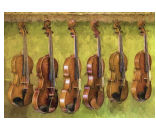

VinVL + VIVO: a wall with a bunch of wooden jars with **cellos** on it in a wall.

NOC-REK\*: a group of **cellos** sitting on top of a table. (cello, table, violin, wall, musical instrument)

NOC-REK: a group of wooden **cello** sticks on a wall. (cello, wall, musical instrument, violin)

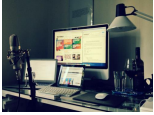

VinVL + VIVO: a desk with two **computer monitors** and a **microphone** next to a glass of wine.

NOC-REK\*: a desk with two **computer monitors** and a **microphone**. (computer monitor, microphone, desk, lamp, bottle)

NOC-REK: a desk with a **laptop** and a **microphone** and a **computer monitor** and a **table lamp**. (microphone, computer monitor, desk, laptop, table lamp)

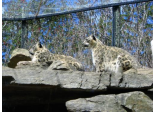

VinVL + VIVO: a **leopard** cat standing next to a **fence** with a **jaguar** in front of a **forest**.

NOC-REK\*: a **jaguar** and a **leopard** print cat standing next to a **fence**. (leopard, jaguar, fence, cat, tree)

NOC-REK: two **jaguar leopards** standing on some **rocks** near a **fence**. (leopard, jaguar, rock, fence, forest)

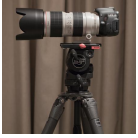

VinVL + VIVO: a **camera** sitting next to a camera with a camera.

NOC-REK\*: a **camera** sitting on top of a camera **tripod**. (tripod, camera, wood, door, wall)

NOC-REK: a **camera** is sitting on top of a **tripod**. (tripod, camera, wall, curtain, wood)

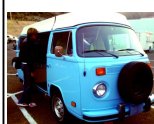

VinVL + VIVO: a person standing in front of a blue **van** parked in a parking lot.

NOC-REK\*: a blue **van** parked in a parking lot with a man. (van, man, person, wheel, parking lot)

NOC-REK: a person standing next to a blue and white **van** in a parking lot. (man, parking lot, van, tire, windshield)

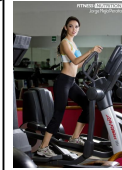

VinVL + VIVO: a **woman** sitting on top of an airport stationary bicycle.

NOC-REK\*: a **woman** sitting on a **treadmill** in a stationary bicycle. (person, woman, treadmill, bicycle, wall)

NOC-REK: a **woman** is standing on a **treadmill** in a gym. (woman, treadmill, mirror, wall, sport equipment)

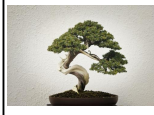

VinVL + VIVO: a **flowerpot** with a houseplant with a tree in front of it.

NOC-REK\*: a houseplant with a tree and a **flowerpot** on it. (tree, flowerpot, bowl, paper, wall)

NOC-REK: a small tree is houseplant in a **flowerpot**. (flowerpot, plotted plan, tree, soil)

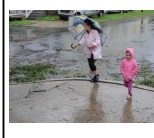

VinVL + VIVO: A couple of children walking in the **rain** with umbrellas in a street.

NOC-REK\*: A **woman** and a little **girl** walking with an umbrella. (umbrella, people, girl, sidewalk, street)

NOC-REK: A **woman** and a little **girl** walking in the **rain** with an umbrella. (umbrella, woman, girl, street, rain)

Figure F. Examples of generated captions by compared methods Nocaps. VinVL+VIVO [11, 12] sometimes cannot include the novel objects in the captions. Our NOC-REK, on the other hand, successfully generates correct, fluent, and coherent captions with novel objects. Words in parentheses are top-5 retrieved vocabulary by our method that are reasonably related to objects in image. **Red** texts indicate novel objects in the captions.



|                                                                                                                                                                                                                                                                                                                                                                                                                                                           |                                                                                                                                                                                                                                                                                                                                                                                                                                                                                                               |
|-----------------------------------------------------------------------------------------------------------------------------------------------------------------------------------------------------------------------------------------------------------------------------------------------------------------------------------------------------------------------------------------------------------------------------------------------------------|---------------------------------------------------------------------------------------------------------------------------------------------------------------------------------------------------------------------------------------------------------------------------------------------------------------------------------------------------------------------------------------------------------------------------------------------------------------------------------------------------------------|
|  <p>VinVL + VIVO: a couple of people standing next to each other in a field with a <b>sign</b>.</p> <p>NOC-REK*: a woman standing in front of a wall with a <b>sign</b>. (<i>sign, woman, person, wall, clothes</i>)</p> <p>NOC-REK: a person in a military <b>uniform</b> with a quote on the back. (<i>person, jacket, uniform, wall, sign</i>)</p>                    |  <p>VinVL + VIVO: a cake with sprinkles on a table with a table.</p> <p>NOC-REK*: a <b>birthday cake</b> with a bunch of <b>toys</b> on it. (<i>toy, table, birthday cake, building, human</i>)</p> <p>NOC-REK: a <b>birthday cake</b> covered in colorful <b>candy</b> on a table. (<i>birthday cake, candy, house, table, wall</i>)</p>                                                                                    |
|  <p>VinVL + VIVO: a group of wooden cabinets with a table with a table in the background.</p> <p>NOC-REK*: a couple of wooden cabinets with a window. (<i>cabinet, window, wood, table, door</i>)</p> <p>NOC-REK: two wooden cabinet doors on the side of each other. (<i>cabinet, lock, window, door, wood</i>)</p>                                                     |  <p>VinVL + VIVO: a <b>man</b> sitting at a desk with a <b>computer</b> on top of a <b>office building</b>.</p> <p>NOC-REK*: a <b>man</b> sitting at a desk with a <b>office building</b>. (<i>man, computer, office building, office chair, desk</i>)</p> <p>NOC-REK: a <b>man</b> sitting at a desk in a <b>office building</b> with a <b>computer</b>. (<i>man, office building, office supplies, computer, desk</i>)</p> |
|  <p>VinVL + VIVO: a <b>smoke</b> stack of water with a <b>lighthouse</b> with a fire hydrant in the background.</p> <p>NOC-REK*: a white <b>lighthouse</b> sitting next to a body of water. (<i>lighthouse, water, cloud, hole, pole</i>)</p> <p>NOC-REK: a <b>lighthouse</b> with a <b>smoke</b> stack in the sky. (<i>sky, lighthouse, smoke, cloud, window</i>)</p>  |  <p>VinVL + VIVO: a cat laying on top of a <b>carnivore</b> with trees in the background.</p> <p>NOC-REK*: a <b>carnivore</b> cat laying on top of a tree. (<i>tree, cat, carnivore, background, dog</i>)</p> <p>NOC-REK: a brown dog laying on a <b>carnivore</b> in a tree. (<i>dog, carnivore, tree, cat, leopard</i>)</p>                                                                                               |
|  <p>VinVL + VIVO: a <b>coffee cup</b> sitting on a tea bag.</p> <p>NOC-REK*: a <b>coffee cup</b> sitting on top of a <b>coffee table</b>. (<i>coffee cup, coffee table, table, cup, window sill</i>)</p> <p>NOC-REK: a <b>coffee cup</b> sitting on top of a <b>coffee table</b> on a <b>window sill</b>. (<i>coffee cup, window sill, coffee table, tea, cup</i>)</p> |  <p>VinVL + VIVO: a couple of <b>babies</b> laying next to each other on a <b>beach</b>. the <b>ocean</b>.</p> <p>NOC-REK*: a <b>man</b> and a <b>woman</b> holding a <b>baby</b>. (<i>man, baby, woman, beach, sky</i>)</p> <p>NOC-REK: a <b>man</b> and a <b>woman</b> holding a <b>baby</b> on the <b>beach</b>. (<i>man, woman, sky, baby, beach</i>)</p>                                                              |

Figure G. Examples of generated captions by compared methods Nocaps. VinVL+VIVO [11, 12] sometimes cannot include the novel objects in the captions. Our NOC-REK, on the other hand, successfully generates correct, fluent, and coherent captions with novel objects. Words in parentheses are top-5 retrieved vocabulary by our method that are reasonably related to objects in image. **Red** texts indicate novel objects in the captions.
